# Supplementary material for: Injuries, Risk Factors, and Prevention Strategies in Bicycle Motocross (BMX): A Scoping Review
Source: PubMed Central journal article supplement (PMC11556568; doi:10.1177/19417381241285037), 2024-10-26
Supplement: sj-pdf-1-sph-10.1177_19417381241285037.pdf [file sj-pdf-1-sph-10.1177_19417381241285037.pdf]

## Appendix 1. Final Search Strategy

Database(s): **Ovid MEDLINE(R) and Epub Ahead of Print, In-Process, In-Data-Review & Other Non-Indexed Citations and Daily** 1946 to June 22, 2023

Search Strategy:

| #  | Searches                   |
|----|----------------------------|
| 1  | injur*.mp.                 |
| 2  | accident*.mp.              |
| 3  | trauma*.mp.                |
| 4  | Accidents/                 |
| 5  | exp Athletic Injuries/     |
| 6  | exp Brain Concussion/      |
| 7  | concuss*.mp.               |
| 8  | exp "Wounds and Injuries"/ |
| 9  | wound*.mp.                 |
| 10 | exp Fractures, Bone/       |
| 11 | fracture*.mp.              |
| 12 | exp Pain/                  |
| 13 | pain.mp.                   |
| 14 | dislocat*.mp.              |
| 15 | exp "Sprains and Strains"/ |
| 16 | (sprain or sprains).mp.    |
| 17 | exp Tears/                 |
| 18 | (tear or tears).mp.        |
| 19 | abrasion*.mp.              |

|    |                                                                                                                                                             |
|----|-------------------------------------------------------------------------------------------------------------------------------------------------------------|
| 20 | (cut or cuts).mp.                                                                                                                                           |
| 21 | exp Lacerations/                                                                                                                                            |
| 22 | laceration*.mp.                                                                                                                                             |
| 23 | exp Burns/                                                                                                                                                  |
| 24 | (burn or burns).mp.                                                                                                                                         |
| 25 | scrape*.mp.                                                                                                                                                 |
| 26 | exp Brain Injuries, Traumatic/                                                                                                                              |
| 27 | "MTBI".mp.                                                                                                                                                  |
| 28 | "TBI".mp.                                                                                                                                                   |
| 29 | 1 or 2 or 3 or 4 or 5 or 6 or 7 or 8 or 9 or 10 or 11 or 12 or 13 or 14 or 15 or 16 or 17 or 18 or 19 or 20 or 21 or 22 or 23 or 24 or 25 or 26 or 27 or 28 |
| 30 | BMX.mp.                                                                                                                                                     |
| 31 | ((track or "off-road" or freestyl* or competitive* or terrain or skatepark*) adj5 (cycling or bicycl* or cyclist* or rider* or racer*)).mp.                 |
| 32 | (motocross or "moto-cross" or supercross).mp.                                                                                                               |
| 33 | 30 or 31 or 32                                                                                                                                              |
| 34 | 29 and 33                                                                                                                                                   |

Database(s): **Embase** 1974 to 2023 June 23

Search Strategy:

| # | Searches      |
|---|---------------|
| 1 | injur*.mp.    |
| 2 | accident*.mp. |
| 3 | trauma*.mp.   |

|    |                         |
|----|-------------------------|
| 4  | exp accident/           |
| 5  | exp sport injury/       |
| 6  | exp brain concussion/   |
| 7  | concuss*.mp.            |
| 8  | exp wound/              |
| 9  | exp injury/             |
| 10 | wound*.mp.              |
| 11 | exp fracture/           |
| 12 | fracture*.mp.           |
| 13 | exp pain/               |
| 14 | pain.mp.                |
| 15 | dislocat*.mp.           |
| 16 | exp sprain/             |
| 17 | (sprain or sprains).mp. |
| 18 | (tear or tears).mp.     |
| 19 | abrasion*.mp.           |
| 20 | (cut or cuts).mp.       |
| 21 | exp laceration/         |
| 22 | laceration*.mp.         |
| 23 | exp burn/               |
| 24 | (burn or burns).mp.     |
| 25 | scrape*.mp.             |

|    |                                                                                                                                                             |
|----|-------------------------------------------------------------------------------------------------------------------------------------------------------------|
| 26 | exp traumatic brain injury/                                                                                                                                 |
| 27 | "MTBI".mp.                                                                                                                                                  |
| 28 | "TBI".mp.                                                                                                                                                   |
| 29 | 1 or 2 or 3 or 4 or 5 or 6 or 7 or 8 or 9 or 10 or 11 or 12 or 13 or 14 or 15 or 16 or 17 or 18 or 19 or 20 or 21 or 22 or 23 or 24 or 25 or 26 or 27 or 28 |
| 30 | BMX.mp.                                                                                                                                                     |
| 31 | ((track or "off-road" or freestyl* or competitive* or terrain or skatepark*) adj5 (cycling or bicycl* or cyclist* or rider* or racer*)).mp.                 |
| 32 | (motocross or "moto-cross" or supercross).mp.                                                                                                               |
| 33 | 30 or 31 or 32                                                                                                                                              |
| 34 | 29 and 33                                                                                                                                                   |

Database(s): **APA PsycInfo** 1806 to June Week 3 2023

Search Strategy:

| # | Searches              |
|---|-----------------------|
| 1 | injur*.mp.            |
| 2 | exp Injuries/         |
| 3 | Accident*.mp.         |
| 4 | Accidents/            |
| 5 | Trauma*.mp.           |
| 6 | exp Brain Concussion/ |
| 7 | concuss*.mp.          |
| 8 | exp Wounds/           |
| 9 | wound*.mp.            |

|    |                                                                                                                                             |
|----|---------------------------------------------------------------------------------------------------------------------------------------------|
| 10 | fracture*.mp.                                                                                                                               |
| 11 | exp Pain/                                                                                                                                   |
| 12 | pain.mp.                                                                                                                                    |
| 13 | dislocat*.mp.                                                                                                                               |
| 14 | (sprain or sprains).mp.                                                                                                                     |
| 15 | (tear or tears).mp.                                                                                                                         |
| 16 | abrasion*.mp.                                                                                                                               |
| 17 | (cut or cuts).mp.                                                                                                                           |
| 18 | laceration*.mp.                                                                                                                             |
| 19 | exp Burns/                                                                                                                                  |
| 20 | (burn or burns).mp.                                                                                                                         |
| 21 | scrape*.mp.                                                                                                                                 |
| 22 | exp Traumatic Brain Injury/                                                                                                                 |
| 23 | "MTBI".mp.                                                                                                                                  |
| 24 | "TBI".mp.                                                                                                                                   |
| 25 | 1 or 2 or 3 or 4 or 5 or 6 or 7 or 8 or 9 or 10 or 11 or 12 or 13 or 14 or 15 or 16 or 17 or 18 or 19 or 20 or 21 or 22 or 23 or 24         |
| 26 | BMX.mp.                                                                                                                                     |
| 27 | ((track or "off-road" or freestyl* or competitive* or terrain or skatepark*) adj5 (cycling or bicycl* or cyclist* or rider* or racer*)).mp. |
| 28 | (motocross or "moto-cross" or supercross).mp.                                                                                               |
| 29 | 26 or 27 or 28                                                                                                                              |
| 30 | 25 and 29                                                                                                                                   |

CINAHL Plus with Full Text (Ebsco)  
 Search modes - Find all my search terms

| #   | Query                                                |
|-----|------------------------------------------------------|
| S1  | (MH "Accidents")                                     |
| S2  | (MH "Trauma")                                        |
| S3  | accident*                                            |
| S4  | trauma*                                              |
| S5  | "injur*"                                             |
| S6  | "dislocat*"                                          |
| S7  | sprain or sprains                                    |
| S8  | tear or tears                                        |
| S9  | "abrasion*"                                          |
| S10 | cut or cuts                                          |
| S11 | (MH "Tears and Lacerations+")                        |
| S12 | "laceration*"                                        |
| S13 | (MH "Burns+")                                        |
| S14 | (MH "Athletic Injuries+") OR (MH "Cycling Injuries") |
| S15 | burn or burns                                        |
| S16 | "scrape*"                                            |
| S17 | (MH "Brain Injuries+")                               |
| S18 | "MTBI"                                               |
| S19 | "TBI"                                                |
| S20 | (MH "Brain Concussion+")                             |
| S21 | "concuss*"                                           |

|     |                                                                                                                                                                           |
|-----|---------------------------------------------------------------------------------------------------------------------------------------------------------------------------|
| S22 | (MH "Wounds and Injuries+")                                                                                                                                               |
| S23 | "wound*"                                                                                                                                                                  |
| S24 | "fracture*"                                                                                                                                                               |
| S25 | (MH "Pain+")                                                                                                                                                              |
| S26 | "pain"                                                                                                                                                                    |
| S27 | S1 OR S2 OR S3 OR S4 OR S5 OR S6 OR S7 OR S8 OR S9 OR S10 OR S11 OR S12 OR S13 OR S14 OR S15 OR S16 OR S17 OR S18 OR S19 OR S20 OR S21 OR S22 OR S23 OR S24 OR S25 OR S26 |
| S28 | "BMX" or motocross or "moto-cross" or supercross                                                                                                                          |
| S29 | (track or "off-road" or freestyl* or competitive* or terrain or skatepark) N5 (cycling or bicycl* or cyclist* or rider* or racer*)                                        |
| S30 | S28 OR S29                                                                                                                                                                |
| S31 | S27 AND S30                                                                                                                                                               |

SportDiscus with Full Text (Ebsco)  
Search modes - Find all my search terms

| #  | Query                                           |
|----|-------------------------------------------------|
| S1 | DE "SPORTS accidents" OR DE "CYCLING accidents" |
| S2 | accident*                                       |
| S3 | trauma*                                         |
| S4 | injur*                                          |
| S5 | pain                                            |
| S6 | tear or tears                                   |
| S7 | cut or cuts                                     |
| S8 | laceration*                                     |

|     |                                                                                                                                                                                                                                                                                                                                                           |
|-----|-----------------------------------------------------------------------------------------------------------------------------------------------------------------------------------------------------------------------------------------------------------------------------------------------------------------------------------------------------------|
| S9  | DE "SPORTS injuries" OR DE "CYCLING injuries" OR DE "MOTORCYCLING injuries"                                                                                                                                                                                                                                                                               |
| S10 | DE "BURNS & scalds"                                                                                                                                                                                                                                                                                                                                       |
| S11 | burn or burns                                                                                                                                                                                                                                                                                                                                             |
| S12 | scrape*                                                                                                                                                                                                                                                                                                                                                   |
| S13 | DE "BRAIN injuries" OR DE "BRAIN damage"                                                                                                                                                                                                                                                                                                                  |
| S14 | mtbi                                                                                                                                                                                                                                                                                                                                                      |
| S15 | tbi                                                                                                                                                                                                                                                                                                                                                       |
| S16 | DE "BRAIN concussion" OR DE "POSTCONCUSSION syndrome"                                                                                                                                                                                                                                                                                                     |
| S17 | concuss*                                                                                                                                                                                                                                                                                                                                                  |
| S18 | DE "WOUNDS & injuries" OR DE "BLUNT trauma" OR DE "BURNS & scalds" OR DE "CRASH injuries" OR DE "DISLOCATIONS (Anatomy)" OR DE "HEAD injuries" OR DE "OVEREXERTION injuries" OR DE "OVERUSE injuries" OR DE "PENETRATING wounds" OR DE "PHYSIOLOGIC strain" OR DE "RUPTURE of organs, tissues, etc." OR DE "SOFT tissue injuries" OR DE "SPORTS injuries" |
| S19 | wound*                                                                                                                                                                                                                                                                                                                                                    |
| S20 | DE "BONE fractures" OR DE "ANKLE fractures" OR DE "AVULSION fractures" OR DE "CARTILAGE fractures" OR DE "COMMINUTED fractures" OR DE "FACIAL bone fractures" OR DE "FRACTURE healing" OR DE "HEEL bone fractures" OR DE "JONES fracture" OR DE "PELVIC fractures" OR DE "STRESS fractures (Orthopedics)" OR DE "WRIST fractures"                         |
| S21 | fracture*                                                                                                                                                                                                                                                                                                                                                 |
| S22 | DE "PAIN"                                                                                                                                                                                                                                                                                                                                                 |
| S23 | (S1 OR S2 OR S3 OR S4 OR S5 OR S6 OR S7 OR S8 OR S9 OR S10 OR S11 OR S12 OR S13 OR S14 OR S15 OR S16 OR S17 OR S18 OR S19 OR S20 OR S21 OR S22)                                                                                                                                                                                                           |
| S24 | DE "BICYCLE motocross" OR DE "BMX bikes" OR DE "X Games (Extreme sports)" OR DE "MOTOCROSS" OR DE "SUPERCROSS"                                                                                                                                                                                                                                            |
| S25 | DE "BICYCLE racing" OR DE "CYCLING competitions" OR DE "STUNT cycling"                                                                                                                                                                                                                                                                                    |



|     |                                                                                                                                      |
|-----|--------------------------------------------------------------------------------------------------------------------------------------|
| S26 | motocross or "moto-cross" or supercross or bmx                                                                                       |
| S27 | (track or "off-road" or "freestyl*" or competitive* or terrain or skatepark) N5 (cycling or bicycl* or cyclist* or rider* or racer*) |
| S28 | S24 OR S25 OR S26 OR S27                                                                                                             |
| S29 | S23 AND S28                                                                                                                          |
