# Supplementary material for: Injuries, Risk Factors, and Prevention Strategies in Bicycle Motocross (BMX): A Scoping Review
Source: PubMed Central journal article supplement (PMC11556568; doi:10.1177/19417381241285037), 2024-10-26
Supplement: sj-pdf-2-sph-10.1177_19417381241285037.pdf [file sj-pdf-2-sph-10.1177_19417381241285037.pdf]

## Appendix 2. List of Included Studies

| <b>First Author</b>      | <b>Year</b> | <b>Title</b>                                                                                                                                                                                               |
|--------------------------|-------------|------------------------------------------------------------------------------------------------------------------------------------------------------------------------------------------------------------|
| Aitken                   | 2014        | Sports-related fractures in South East Scotland: An analysis of 990 fractures                                                                                                                              |
| Beck                     | 2016        | Bicycling crash characteristics: An in-depth crash investigation study                                                                                                                                     |
| Black                    | 2021        | Sport participation and injury rates in high school students: A Canadian survey of 2029 adolescents                                                                                                        |
| Brøgger-Jensen           | 1990        | Injuries at the BMX Cycling European Championship, 1989                                                                                                                                                    |
| Clarsen                  | 2021        | Methods for epidemiological studies in competitive cycling: An extension of the IOC consensus statement on methods for recording and reporting of epidemiological data on injury and illness in sport 2020 |
| Diab                     | 2021        | Pediatric facial fractures in South Australia: Epidemiology, clinical characteristics, and outcomes                                                                                                        |
| Durand                   | 2018        | Traumatic obturator hip dislocation with marginal femoral head fracture in a 15-year-old adolescent: A high-energy trauma - A case report and a review of the literature                                   |
| Engebretsen              | 2013        | Sports injuries and illnesses during the London Summer Olympic Games 2012                                                                                                                                  |
| Fancourt                 | 2022        | Serious cycling-related fractures in on and off-road accidents: A retrospective analysis in the Australian Capital Territory region                                                                        |
| Fixsen<br>(Case Report)  | 1989        | Bilateral intra-articular loose bodies of the elbow in an adolescent BMX rider                                                                                                                             |
| Gaskell<br>(Case Report) | 1987        | Prolapsed lumbar intervertebral disc in an adolescent BMX bike rider                                                                                                                                       |
| Goldstein<br>(Abstract)  | 2011        | Varied histories of blunt perineal trauma in young men with erectile dysfunction who undergo penile revascularization surgery                                                                              |
| Hardwick                 | 2022        | An investigation into helmet use, perceptions of sports-related concussion, and seeking medical care for head injury amongst competitive cyclists.                                                         |
| Hurst                    | 2018        | Profiling of translational and rotational head accelerations in youth BMX with and without neck brace.                                                                                                     |
| Illingworth              | 1984        | Injuries to children riding BMX bikes                                                                                                                                                                      |
| Illingworth              | 1985        | BMX compared with ordinary bicycle accidents                                                                                                                                                               |
| Ipaktchi                 | 2010        | Subclavian artery and jugular vein rupture after a blunt thoracic trauma due to a BMX handlebar                                                                                                            |
| Izumi                    | 2006        | A case of bilateral testicular calcifications in a bicycle motocross rider accompanied by bulbar urethral injury                                                                                           |

|                            |      |                                                                                                                                              |
|----------------------------|------|----------------------------------------------------------------------------------------------------------------------------------------------|
| Jackson                    | 1994 | Safety considerations in bicycle moto-cross racing: A case study                                                                             |
| Johnson                    | 1987 | Spinal injuries and BMX bicycles                                                                                                             |
| Kirchberg<br>(Case Report) | 2021 | Upper thoracic back pain in an Olympic BMX biker                                                                                             |
| Klin                       | 2016 | Abdominal injuries following bicycle-related blunt abdominal trauma in children.                                                             |
| Konczak                    | 2010 | Chiropractic utilization in BMX athletes at the UCI World Championships: a retrospective study                                               |
| Moyes                      | 1990 | Injuries to child cyclists in the Bay of Plenty                                                                                              |
| Muthucumaru                | 2012 | Trend of severe abdominal injuries from bicycle accidents in children: A preventable condition                                               |
| Oller                      | 2012 | Recalcitrant supraventricular tachycardia in a professional freestyle BMX rider                                                              |
| Park                       | 1986 | BMX bicycle injuries in children                                                                                                             |
| Senturia                   | 1997 | Bicycle-riding circumstances and injuries in school-aged children                                                                            |
| Soligard                   | 2017 | Sports injury an illness incidence in the Rio de Janeiro 2016 Olympic Summer Games: A prospective study of 11274 athletes from 207 countries |
| Soligard                   | 2023 | New sports, COVID-19 and the heat: Sports injuries and illnesses in the Tokyo 2020 Summer Olympics                                           |
| Soysa<br>(Short report)    | 1984 | BMX bike injuries: The latest epidemic                                                                                                       |
| Sparnon<br>(Case report)   | 1982 | BMX handlebar. A threat to manhood?                                                                                                          |
| Stathakis<br>(Report)      | 1997 | Recreational injury to older children (10-14 year olds)                                                                                      |
| Tierney<br>(Abstract)      | 2018 | Effect of BMX riding on head impact kinematics and concussion assessment scores                                                              |
| Vaca                       | 2005 | Skatepark-related injuries in a southern California skatepark and their associated short-term disability and healthcare utilization          |
| Wetterhall                 | 1988 | Injury surveillance at the 1985 National Boy Scout Jamboree                                                                                  |
| Worrell                    | 1985 | BMX bicycles: Accident comparison with other models                                                                                          |
