# Supplementary material for: Injuries, Risk Factors, and Prevention Strategies in Bicycle Motocross (BMX): A Scoping Review
Source: PubMed Central journal article supplement (PMC11556568; doi:10.1177/19417381241285037), 2024-10-26

### Appendix 3. Additional Study Characteristic Figures

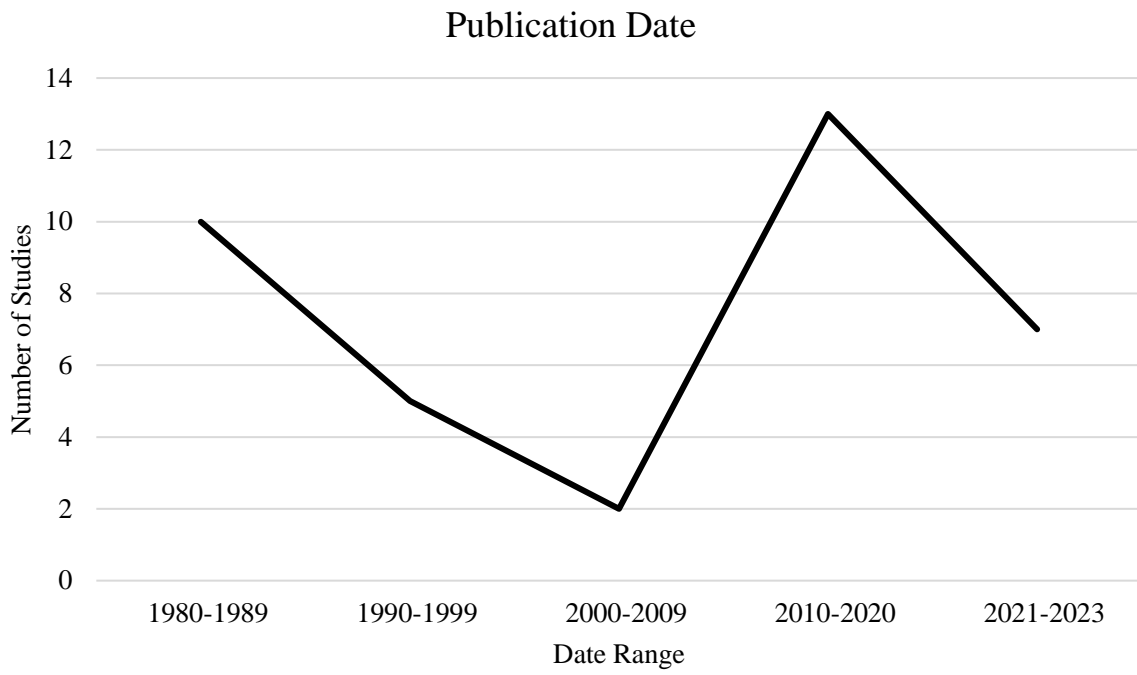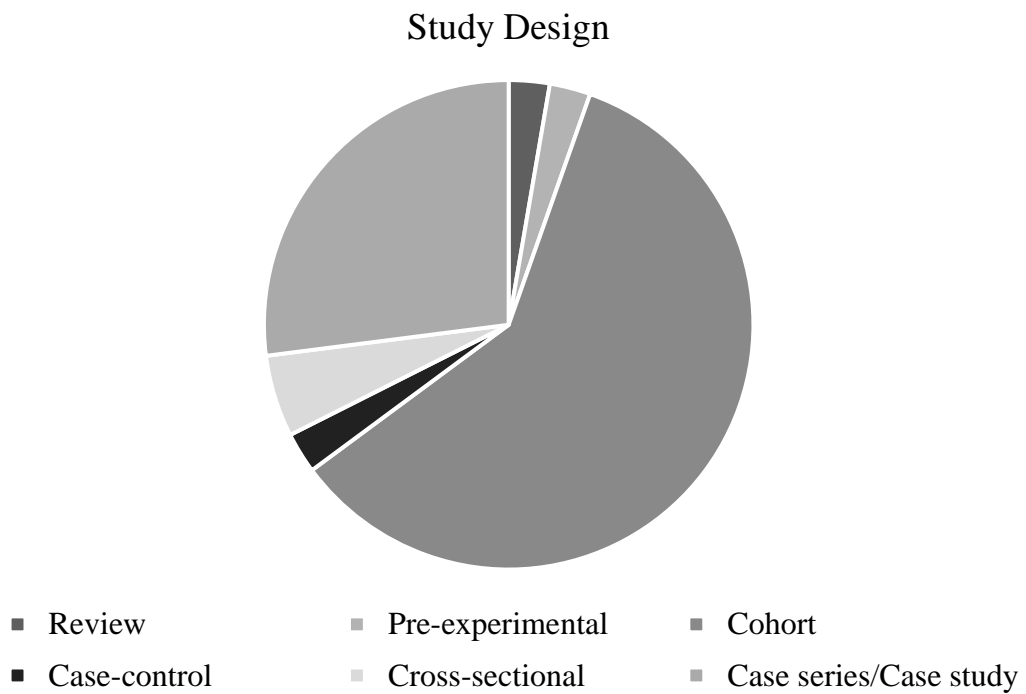

Supplement: sj-pdf-3-sph-10.1177_19417381241285037.pdf [file sj-pdf-3-sph-10.1177_19417381241285037.pdf]
